# Supplementary material for: A series of new hybrid chalcogenogermanates: the rare examples of chalcogenogermanates combined with trivalent vanadium complexes
Source: Royal Society of Chemistry journal article supplement (doi:10.1039/c9dt02077b), 2019-01-01
Supplement: c9dt02077b1.pdf [file c9dt02077b1.pdf]

## A series of new hybrid chalcogenogermanates: the rare examples of chalcogenogermanates combined with trivalent vanadium complexes

Hai-Ying Luo, Jian Zhou and Shumei Cao

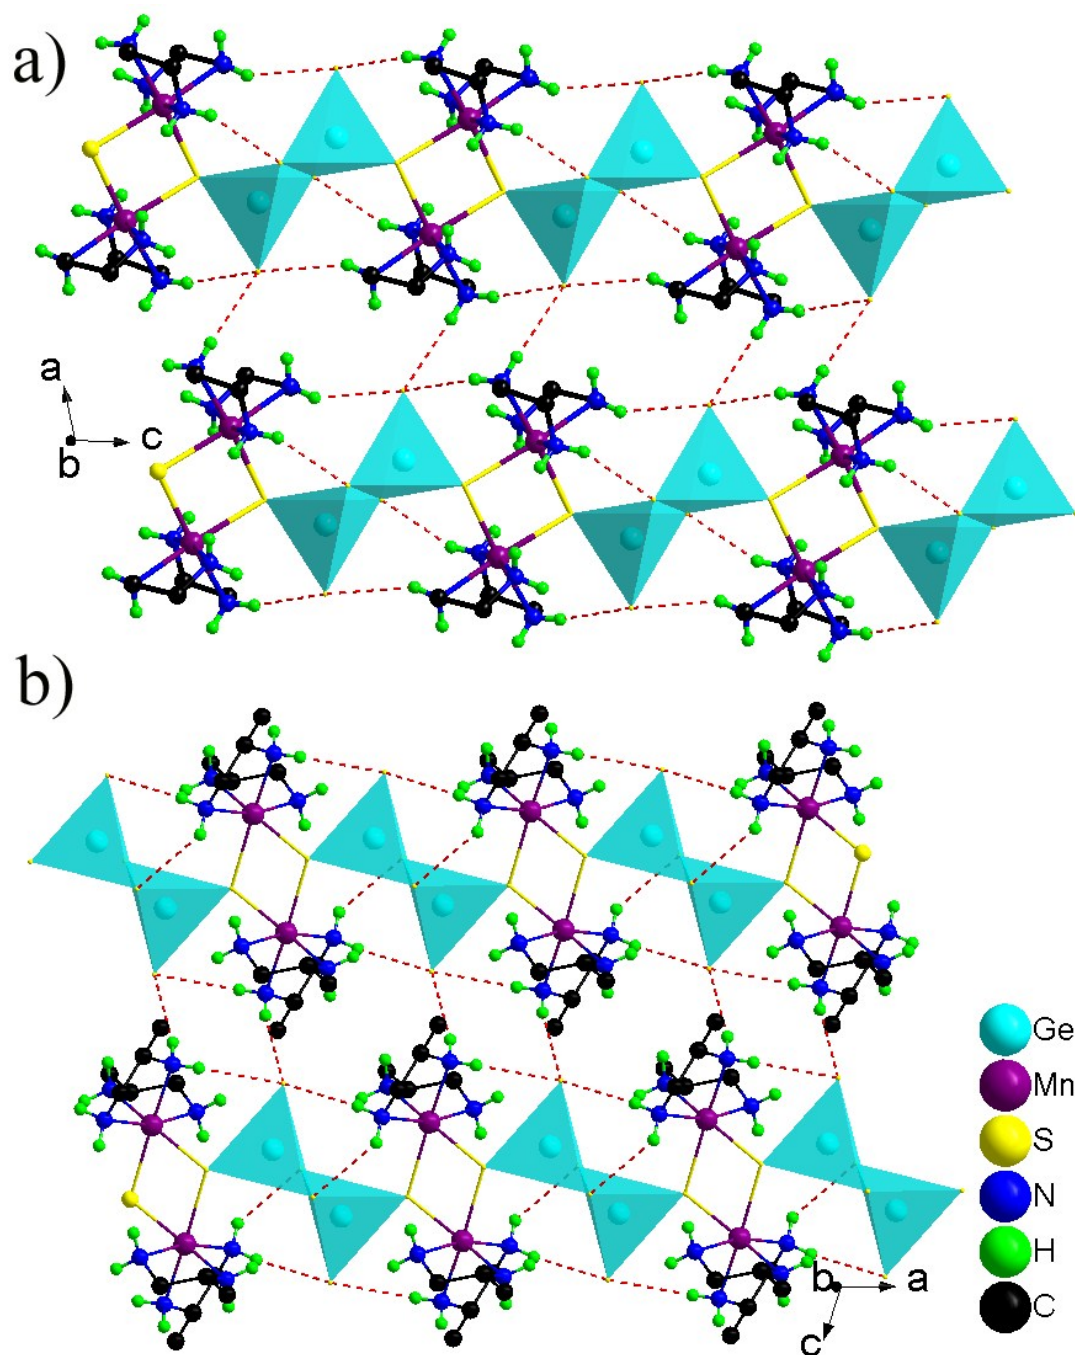

Fig. S1 The formation of 2-D layers constructed from N-H...S H-bonds in 1 (a) and 2 (b).

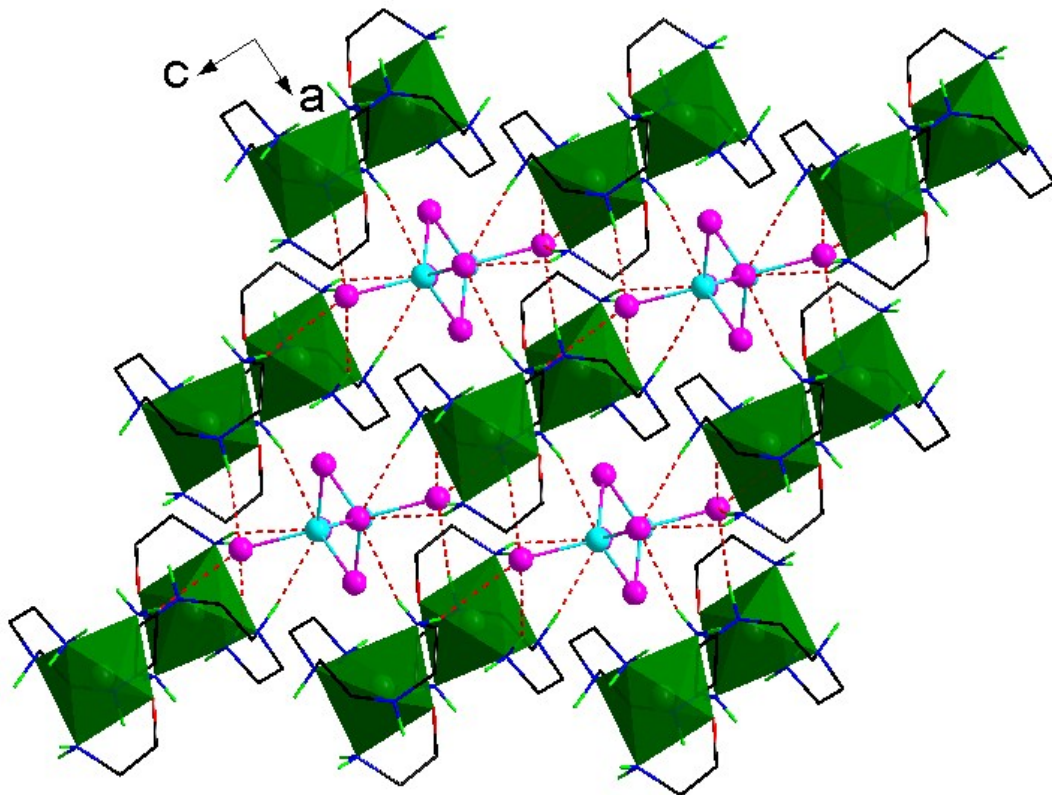

Fig. S2 3-D H-bonding network structure in **5**. All H bonded to C atoms are omitted for clarity.

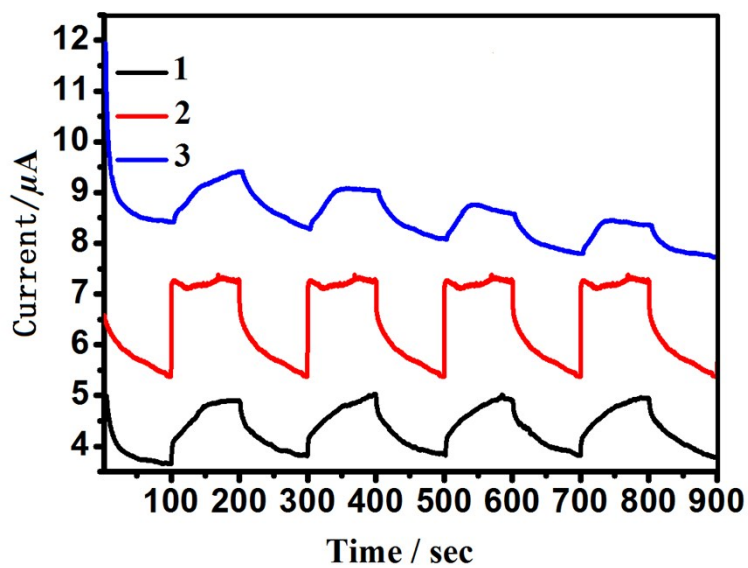

Fig. S3 Photocurrent density versus time of **1-3** at 0.6 V potential.

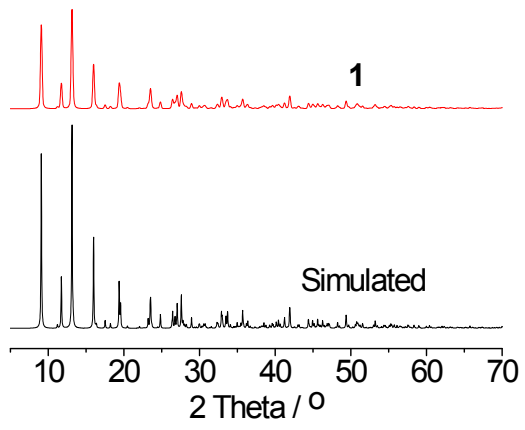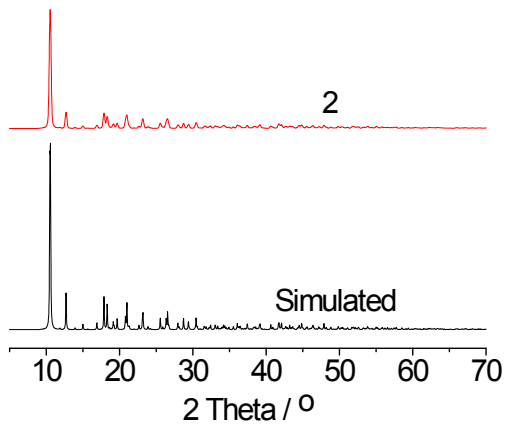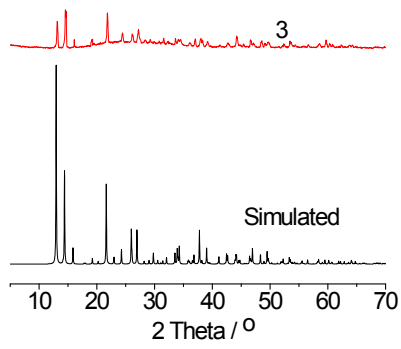

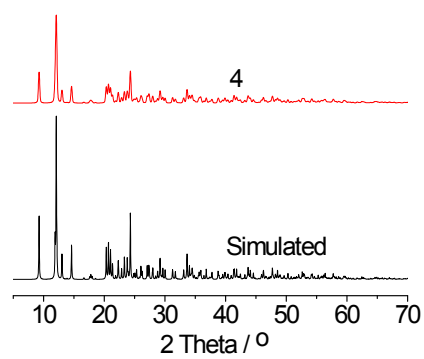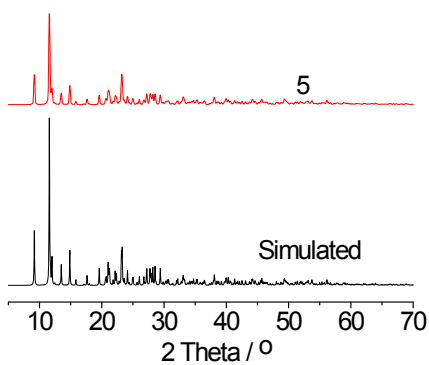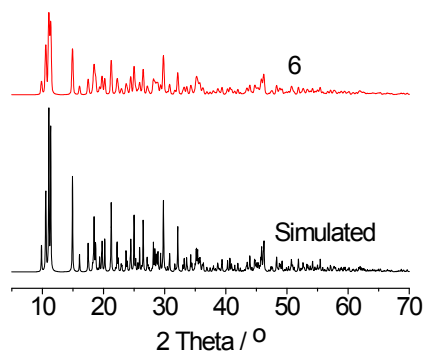

Fig. S5 Simulated, experimental powder XRD patterns of polycrystalline samples of **1-6**.

Table S1 Hydrogen bonds for **1** [Å and deg].

| D-H···A             | d(D-H) | d(H···A) | d(D···A) | <(DHA) |
|---------------------|--------|----------|----------|--------|
| N(1)-H(1A)···S(3)#1 | 0.90   | 2.64     | 3.542(3) | 175.2  |
| N(1)-H(1B)···S(3)   | 0.90   | 2.60     | 3.474(3) | 163.0  |
| N(2)-H(2A)···S(2)#2 | 0.90   | 2.87     | 3.658(3) | 147.4  |
| N(2)-H(2B)···S(2)#3 | 0.90   | 2.61     | 3.437(3) | 153.4  |

|                     |      |      |          |       |
|---------------------|------|------|----------|-------|
| N(3)-H(3A)···S(3)#1 | 0.90 | 2.85 | 3.733(4) | 165.6 |
| N(3)-H(3B)···S(3)#3 | 0.90 | 2.75 | 3.557(3) | 149.2 |

Symmetry transformations used to generate equivalent atoms: (#1)  $-x+2, -y, -z+2$ ; (#2)  $x, -y+1/2, z+1/2$ ; (#3)  $x, y, z+1$ .

Table S2 Hydrogen bonds for **2** [Å and deg].

| D-H···A              | d(D-H) | d(H···A) | d(D···A) | <(DHA) |
|----------------------|--------|----------|----------|--------|
| N(4)-H(4AA)···S(2)#1 | 0.90   | 2.69     | 3.355(3) | 132.0  |
| N(4)-H(4AB)···S(3)#1 | 0.90   | 2.61     | 3.497(3) | 167.4  |
| N(4)-H(4AB)···S(3)#1 | 0.90   | 2.61     | 3.497(3) | 167.4  |
| N(4)-H(4AA)···S(2)#1 | 0.90   | 2.69     | 3.355(3) | 132.0  |
| N(3)-H(3BC)···S(3)#3 | 0.90   | 2.65     | 3.514(3) | 160.6  |
| N(3)-H(3BD)···S(3)#2 | 0.90   | 2.70     | 3.561(3) | 159.8  |
| N(3)-H(3BC)···S(3)#3 | 0.90   | 2.65     | 3.514(3) | 160.6  |
| N(3)-H(3BD)···S(3)#2 | 0.90   | 2.70     | 3.561(3) | 159.8  |
| N(1)-H(1BD)···S(2)   | 0.90   | 2.91     | 3.797(4) | 167.1  |
| N(1)-H(1BD)···S(2)   | 0.90   | 2.91     | 3.797(4) | 167.1  |

Symmetry transformations used to generate equivalent atoms: (#1)  $-x+1, -y+1, -z-1$ ; (#2)  $-x, -y+1, -z+1$ ; (#3)  $x, y, z+1$ .

Table S3 Hydrogen bonds for **3** [Å and deg].

| D-H···A             | d(D-H) | d(H···A) | d(D···A) | <(DHA) |
|---------------------|--------|----------|----------|--------|
| N(2)-H(2A)···S(1)#1 | 0.90   | 2.78     | 3.646(5) | 161.7  |
| N(1)-H(1A)···S(2)#2 | 0.89   | 2.35     | 3.234(4) | 174.4  |
| N(1)-H(1C)···S(2)#3 | 0.89   | 2.72     | 3.578(4) | 163.1  |
| N(1)-H(1B)···S(1)#3 | 0.89   | 2.88     | 3.379(4) | 116.9  |

Symmetry transformations used to generate equivalent atoms: (#1)  $x, y, z+1$ ; (#2)  $-x+1/2, y-1/2, -z+3$ ; (#3)  $-x+1, -y, z+1$ .

Table S4 Hydrogen bonds for **4** [Å and deg].

| D-H...A              | d(D-H) | d(H...A) | d(D...A) | <(DHA) |
|----------------------|--------|----------|----------|--------|
| N(1)-H(1A)...Se(1)#2 | 0.90   | 2.91     | 3.674(7) | 144.3  |
| N(1)-H(1B)...Se(3)   | 0.90   | 3.05     | 3.802(7) | 142.6  |
| N(2)-H(2A)...Se(3)#2 | 0.90   | 2.77     | 3.634(7) | 161.6  |
| N(3)-H(3A)...Se(1)#3 | 0.90   | 2.72     | 3.569(7) | 157.5  |
| N(3)-H(3B)...Se(3)   | 0.90   | 2.89     | 3.720(7) | 153.8  |
| N(4)-H(4A)...Se(3)#3 | 0.90   | 3.06     | 3.863(7) | 150.1  |
| N(4)-H(4B)...O(1)#4  | 0.90   | 1.94     | 2.836(9) | 177.0  |
| N(5)-H(5A)...Se(1)#1 | 0.90   | 2.60     | 3.438(7) | 154.7  |
| N(5)-H(5B)...Se(3)   | 0.90   | 2.60     | 3.485(7) | 168.6  |

Symmetry transformations used to generate equivalent atoms: (#1)  $-x,-y,-z+2$ ; (#2)  $x-1/2,-y+1/2,z+1/2$ ; (#3)  $x+1/2,-y+1/2,z+1/2$ ; (#4)  $-x,-y,-z+3$ .

Table S5 Hydrogen bonds for **5** [Å and deg].

| D-H...A              | d(D-H) | d(H...A) | d(D...A) | <(DHA) |
|----------------------|--------|----------|----------|--------|
| N(1)-H(1A)...Se(3)   | 0.90   | 2.81     | 3.628(6) | 151.0  |
| N(1)-H(1B)...Se(1)#1 | 0.90   | 2.62     | 3.460(6) | 155.1  |
| N(2)-H(2A)...Se(1)#2 | 0.90   | 2.88     | 3.569(6) | 134.7  |
| N(2)-H(2B)...Se(3)#3 | 0.90   | 2.85     | 3.653(6) | 149.5  |
| N(3)-H(3C)...Se(1)#4 | 0.91   | 2.60     | 3.452(6) | 156.4  |
| N(4)-H(4C)...Se(3)   | 0.91   | 2.64     | 3.511(6) | 159.5  |
| N(5)-H(5A)...O(1)#5  | 0.90   | 2.06     | 2.942(7) | 167.1  |
| N(5)-H(5B)...Se(1)#1 | 0.90   | 2.82     | 3.605(6) | 147.2  |

Symmetry transformations used to generate equivalent atoms: (#1)  $-x+1,-y+1,-z+2$ ; (#2)  $x,y,z-1$ ; (#3)  $x-1/2,-y+3/2,z-1/2$ ; (#4)  $x+1/2,-y+3/2,z-1/2$ ; (#5)  $-x+1,-y+1,-z+1$ .

Table S6 Hydrogen bonds for **6** [Å and deg].

| D-H...A | d(D-H) | d(H...A) | d(D...A) | <(DHA) |
|---------|--------|----------|----------|--------|
|---------|--------|----------|----------|--------|

|                      |           |         |          |        |
|----------------------|-----------|---------|----------|--------|
| N(1)-H(1A)...Se(3)#3 | 0.90      | 2.79    | 3.666(3) | 164.7  |
| N(1)-H(1B)...Se(1)#4 | 0.90      | 2.84    | 3.623(3) | 145.7  |
| N(2)-H(2A)...Se(1)#5 | 0.90      | 2.88    | 3.647(3) | 143.8  |
| N(2)-H(2B)...Se(3)   | 0.90      | 2.88    | 3.590(3) | 136.7  |
| N(3)-H(3B)...Se(1)   | 0.90      | 2.92    | 3.790(3) | 163.1  |
| N(4)-H(4A)...Se(1)#5 | 0.90      | 2.86    | 3.752(3) | 169.2  |
| N(4)-H(4B)...N(6)#2  | 0.90      | 2.21    | 3.020(5) | 148.9  |
| N(5)-H(5A)...Se(3)#3 | 0.90      | 2.66    | 3.363(3) | 135.4  |
| N(5)-H(5A)...N(6)    | 0.90      | 2.43    | 2.893(4) | 112.4  |
| N(5)-H(5B)...Se(3)   | 0.90      | 2.63    | 3.517(3) | 169.0  |
| N(6)-H(6D)...Se(2)#6 | 0.886(10) | 2.83(2) | 3.607(3) | 147(4) |
| N(6)-H(6C)...Se(3)#3 | 0.891(10) | 2.80(2) | 3.651(4) | 160(4) |

Symmetry transformations used to generate equivalent atoms: (#1)  $-x+1,-y+1,-z+2$ ;  
 (#2)  $-x+1,-y+2,-z+1$ ; (#3)  $-x+1,-y+2,-z+2$ ; (#4)  $x,y+1,z$ ; (#5)  $-x,-y+1,-z+1$ ; (#6)  
 $x+1,y+1,z$ .
